# Supplementary material
Source: PubMed Central journal article supplement (PMC3899892)
Supplement: NIHMS516601-supplement-supp_data.pdf [file NIHMS516601-supplement-supp_data.pdf]

**A Randomized, Double-Blind, Placebo-Controlled Study to Evaluate the Effect of Repeated Oral Doses of Pazopanib on Cardiac Conduction in Patients with Solid Tumors**

Elisabeth I. Heath<sup>1</sup>, Jeffrey Infante<sup>2</sup>, Lionel D. Lewis<sup>3</sup>, Thehang Luu<sup>4</sup>, Joe Stephenson<sup>5</sup>,  
Antoinette R. Tan<sup>6</sup>, Saifuddin Kasubhai<sup>7</sup>, Patricia LoRusso<sup>1</sup>, Bo Ma<sup>8</sup>, A. Benjamin Suttle<sup>8</sup>,  
Joseph F. Kleha<sup>8</sup>, Howard A. Ball<sup>8</sup>, Mohammed M. Dar<sup>8</sup>

<sup>1</sup>Division of Hematology/Oncology, Karmanos Cancer Institute, Wayne State University, Detroit, MI, USA;

<sup>2</sup>Drug Development Unit, Sarah Cannon Research Institute, Nashville, TN, USA; <sup>3</sup>Department of Clinical Pharmacology, The Norris Cotton Cancer Center and the Geisel School of Medicine at Dartmouth, Lebanon, NH, USA; <sup>4</sup>Medical Oncology, City of Hope National Medical Center, Duarte, CA, USA;

<sup>5</sup>Institute for Translational Oncology Research, Greenville Hospital University Medical Center, Greenville, SC, USA; <sup>6</sup>Medical Oncology, The Cancer Institute of New Jersey, New Brunswick, NJ, USA;

<sup>7</sup>Department of Hematology/Oncology, Northwest Medical Specialists, Tacoma, WA, USA;

<sup>8</sup>GlaxoSmithKline, Research Triangle Park, NC, and Upper Providence, PA, USA

**Correspondence:**

Dr. Elisabeth I. Heath  
Barbara Ann Karmanos Cancer Institute  
Division of Hematology/Oncology  
4100 John R  
Detroit, MI 48201  
Phone: (313) 576-8715  
Fax: (313) 576-8767  
Email: [heathe@karmanos.org](mailto:heathe@karmanos.org)

**ONLINE SUPPLEMENTARY MATERIAL**

This study investigated the relationship between pazopanib treatment and QTc prolongation in patients with advanced cancer; a positive control (moxifloxacin) was included to validate the sensitivity of the analyses. The online supplementary tables provide additional results regarding the effects of moxifloxacin, specific electrocardiographic (ECG) abnormalities in pazopanib-treated patients, overall safety results, and additional ad-hoc analyses.

*Cancer Chemotherapy and Pharmacology***Supplementary Table S1. Mean baseline Bazett-corrected QT Interval (QTcB) in msec (SD) by Treatment on Day 1 and by Treatment on Days 2 to 9**

| <b>Evaluable Population, N = 65</b>         |                                            |                          |                                           |                         |
|---------------------------------------------|--------------------------------------------|--------------------------|-------------------------------------------|-------------------------|
| <b>Baseline (Day -1)<br/>Time Point, hr</b> | <b>Placebo<sub>moxi</sub><br/>(n = 31)</b> | <b>Moxi<br/>(n = 34)</b> | <b>Placebo<sub>paz</sub><br/>(n = 32)</b> | <b>Paz<br/>(n = 33)</b> |
| -0.5                                        | 427.1 (19.2)                               | 431.5 (21.1)             | 430.1 (20.3)                              | 428.5 (20.3)            |
| 1                                           | 428.2 (19.3)                               | 429.3 (23.2)             | 428.8 (23.5)                              | 428.8 (19.1)            |
| 2                                           | 430.8 (17.5)                               | 431.4 (24.5)             | 429.3 (24.9)                              | 432.9 (17.2)            |
| 3                                           | 432.2 (18.6)                               | 432.5 (22.0)             | 431.6 (23.6)                              | 433.1 (16.8)            |
| 4                                           | 432.7 (16.7)                               | 429.9 (23.4)             | 430.7 (23.4)                              | 431.7 (17.4)            |
| 6                                           | 432.3 (18.1)                               | 434.3 (25.3)             | 431.9 (24.0)                              | 434.7 (20.2)            |
| 8                                           | 428.9 (18.9)                               | 428.6 (24.0)             | 427.4 (24.1)                              | 430.0 (19.1)            |
| <b>Intent-to-Treat Population, N = 96</b>   |                                            |                          |                                           |                         |
|                                             | <b>Placebo<sub>moxi</sub><br/>(n = 48)</b> | <b>Moxi<br/>(n = 48)</b> | <b>Placebo<sub>paz</sub><br/>(n = 47)</b> | <b>Paz<br/>(n = 48)</b> |
| -0.5                                        | 424.7 (17.8)                               | 432.7 (21.3)             | 429.3 (20.2)                              | 428.3 (19.0)            |
| 1                                           | 426.6 (18.6)                               | 431.1 (23.0)             | 429.4 (22.5)                              | 428.9 (19.3)            |
| 2                                           | 428.6 (17.4)                               | 431.5 (24.3)             | 429.7 (23.2)                              | 431.4 (18.0)            |
| 3                                           | 430.0 (17.1)                               | 433.3 (22.2)             | 431.9 (22.3)                              | 432.2 (16.6)            |
| 4                                           | 431.2 (16.1)                               | 431.9 (23.3)             | 431.9 (22.3)                              | 431.8 (17.2)            |
| 6                                           | 431.7 (16.8)                               | 435.0 (24.2)             | 432.7 (21.3)                              | 434.8 (19.9)            |
| 8                                           | 428.0 (17.2)                               | 429.3 (24.6)             | 428.5 (22.9)                              | 429.6 (19.0)            |

Abbreviations: Moxi, moxifloxacin; Paz, pazopanib; SD, standard deviation.

*Cancer Chemotherapy and Pharmacology***Supplementary Table S2. Mean baseline Fridericia-corrected QT Interval (QTcF) in msec (SD) by Treatment on Day 1 and by Treatment on Days 2 to 9**

| <b>Evaluable Population, N = 65</b>         |                                            |                          |                                           |                         |
|---------------------------------------------|--------------------------------------------|--------------------------|-------------------------------------------|-------------------------|
| <b>Baseline (Day -1)<br/>Time Point, hr</b> | <b>Placebo<sub>moxi</sub><br/>(n = 31)</b> | <b>Moxi<br/>(n = 34)</b> | <b>Placebo<sub>paz</sub><br/>(n = 32)</b> | <b>Paz<br/>(n = 33)</b> |
| -0.5                                        | 409.1 (19.0)                               | 414.7 (17.1)             | 415.9 (21.4)                              | 408.5 (14.5)            |
| 1                                           | 413.6 (16.5)                               | 416.2 (17.8)             | 416.8 (20.8)                              | 413.2 (12.6)            |
| 2                                           | 415.2 (15.8)                               | 417.0 (18.9)             | 417.4 (22.1)                              | 414.9 (11.2)            |
| 3                                           | 416.0 (16.2)                               | 417.4 (19.0)             | 418.4 (21.6)                              | 415.1 (12.7)            |
| 4                                           | 415.9 (16.3)                               | 413.0 (18.0)             | 416.4 (20.8)                              | 412.4 (12.6)            |
| 6                                           | 411.9 (16.9)                               | 416.8 (21.0)             | 415.8 (22.0)                              | 413.2 (16.2)            |
| 8                                           | 409.4 (16.8)                               | 413.8 (19.8)             | 414.0 (21.2)                              | 409.4 (15.2)            |
| <b>Intent-to-Treat Population, N = 96</b>   |                                            |                          |                                           |                         |
|                                             | <b>Placebo<sub>moxi</sub><br/>(n = 48)</b> | <b>Moxi<br/>(n = 48)</b> | <b>Placebo<sub>paz</sub><br/>(n = 47)</b> | <b>Paz<br/>(n = 48)</b> |
| -0.5                                        | 408.7 (17.0)                               | 415.3 (17.9)             | 414.8 (20.7)                              | 409.6 (13.7)            |
| 1                                           | 413.7 (15.2)                               | 417.3 (18.4)             | 417.5 (20.1)                              | 414.0 (12.7)            |
| 2                                           | 414.8 (14.6)                               | 416.1 (19.2)             | 417.2 (20.2)                              | 414.5 (12.2)            |
| 3                                           | 416.2 (15.1)                               | 417.9 (19.4)             | 419.1 (20.8)                              | 415.7 (12.5)            |
| 4                                           | 415.2 (14.9)                               | 415.1 (18.9)             | 417.1 (20.4)                              | 413.9 (12.1)            |
| 6                                           | 412.0 (15.3)                               | 417.0 (20.0)             | 415.4 (19.6)                              | 414.5 (15.7)            |
| 8                                           | 409.1 (15.0)                               | 413.3 (20.3)             | 413.0 (20.5)                              | 410.2 (14.3)            |

Abbreviations: Moxi, moxifloxacin; Paz, pazopanib; SD, standard deviation.

*Cancer Chemotherapy and Pharmacology***Supplementary Table S3. Least-Squares Mean Difference in QTc Change from Baseline for Patients Receiving Moxifloxacin Compared with Placebo**

| <b>Evaluable Population, N = 65</b> |                                                |                                                |                                                |
|-------------------------------------|------------------------------------------------|------------------------------------------------|------------------------------------------------|
| <b>Day 1<br/>Time Point, hr</b>     | <b>QTcF, msec<br/>Mean Difference (90% CI)</b> | <b>QTcB, msec<br/>Mean Difference (90% CI)</b> | <b>QTci, msec<br/>Mean Difference (90% CI)</b> |
| -0.5                                | -1.45 (-8.04, 5.14)                            | 1.54 (-5.21, 8.30)                             | 0.12 (-7.22, 7.47)                             |
| 1                                   | 5.94 (-0.47, 12.36)                            | 7.39 (0.85, 13.93)                             | 7.21 (0.01, 14.41)                             |
| 2                                   | 5.28 (-1.13, 11.70)                            | 4.40 (-2.14, 10.94)                            | 6.00 (-1.20, 13.20)                            |
| 3                                   | 10.61 (4.20, 17.03)                            | 11.70 (5.17, 18.24)                            | 11.92 (4.73, 19.11)                            |
| 4                                   | 9.30 (2.89, 15.72)                             | 10.13 (3.59, 16.68)                            | 9.42 (2.23, 16.61)                             |
| 6                                   | 6.93 (0.51, 13.35)                             | 6.88 (0.34, 13.42)                             | 7.75 (0.56, 14.95)                             |
| 8                                   | 9.26 (2.84, 15.68)                             | 13.17 (6.63, 19.71)                            | 11.09 (3.89, 18.28)                            |

  

| <b>Intent-to-Treat Population, N = 96</b> |                                                |                                                |                                                |
|-------------------------------------------|------------------------------------------------|------------------------------------------------|------------------------------------------------|
|                                           | <b>QTcF, msec<br/>Mean Difference (90% CI)</b> | <b>QTcB, msec<br/>Mean Difference (90% CI)</b> | <b>QTci, msec<br/>Mean Difference (90% CI)</b> |
| -0.5                                      | 0.53 (-5.12, 6.17)                             | 0.68 (-4.87, 6.24)                             | 0.82 (-5.06, 6.70)                             |
| 1                                         | 8.12 (2.63, 13.61)                             | 8.60 (3.25, 13.95)                             | 8.34 (2.61, 14.07)                             |
| 2                                         | 8.85 (3.36, 14.34)                             | 8.65 (3.30, 14.00)                             | 8.86 (3.14, 14.59)                             |
| 3                                         | 10.76 (5.27, 16.25)                            | 11.93 (6.58, 17.28)                            | 11.41 (5.69, 17.14)                            |
| 4                                         | 10.26 (4.78, 15.74)                            | 11.14 (5.79, 16.48)                            | 10.11 (4.40, 15.83)                            |
| 6                                         | 10.85 (5.36, 16.34)                            | 10.50 (5.16, 15.85)                            | 10.51 (4.79, 16.23)                            |
| 8                                         | 11.32 (5.82, 16.81)                            | 12.86 (7.50, 18.21)                            | 11.42 (5.70, 17.14)                            |

Abbreviations: CI, confidence interval; QTcB, Bazett-corrected QT interval; QTcF, Fridericia-corrected QT interval; QTci, calculated individual QT interval.

*Cancer Chemotherapy and Pharmacology***Supplementary Table S4. Least-Squares Mean Difference in QTc Change from Baseline for Patients Receiving Pazopanib Compared with Placebo**

| Day 9<br>Time Point, hr | Evaluable Population, N = 65           |                                        |                                        |
|-------------------------|----------------------------------------|----------------------------------------|----------------------------------------|
|                         | QTcF, msec<br>Mean Difference (90% CI) | QTcB, msec<br>Mean Difference (90% CI) | QTci, msec<br>Mean Difference (90% CI) |
| -0.5                    | -0.20 (-7.10, 6.70)                    | -1.29 (-8.83, 6.26)                    | -0.89 (-8.50, 6.73)                    |
| 1                       | 3.96 (-2.82, 10.74)                    | -0.99 (-8.39, 6.41)                    | 1.85 (-5.65, 9.35)                     |
| 2                       | 1.96 (-4.82, 8.74)                     | -1.89 (-9.30, 5.52)                    | 0.51 (-6.99, 8.00)                     |
| 3                       | 2.10 (-4.69, 8.88)                     | -2.08 (-9.48, 5.33)                    | 0.73 (-6.77, 8.23)                     |
| 4                       | 1.42 (-5.36, 8.21)                     | -2.36 (-9.77, 5.04)                    | 0.22 (-7.29, 7.72)                     |
| 6                       | 4.33 (-2.45, 11.11)                    | -2.99 (-10.39, 4.42)                   | 1.22 (-6.28, 8.72)                     |
| 8                       | 4.43 (-2.36, 11.22)                    | -3.21 (-10.61, 4.19)                   | 1.71 (-5.79, 9.21)                     |

  

| Day 9<br>Time Point, hr | Intent-to-Treat Population, N = 96     |                                        |                                        |
|-------------------------|----------------------------------------|----------------------------------------|----------------------------------------|
|                         | QTcF, msec<br>Mean Difference (90% CI) | QTcB, msec<br>Mean Difference (90% CI) | QTci, msec<br>Mean Difference (90% CI) |
| -0.5                    | 0.48 (-5.22, 6.19)                     | -1.48 (-7.83, 4.88)                    | -1.90 (-8.56, 4.76)                    |
| 1                       | 2.89 (-2.70, 8.48)                     | -2.55 (-8.76, 3.65)                    | 1.06 (-6.50, 6.61)                     |
| 2                       | 1.20 (-4.42, 6.82)                     | -3.28 (-9.53, 2.97)                    | -1.20 (-7.78, 5.38)                    |
| 3                       | 2.16 (-3.47, 7.78)                     | -3.11 (-9.36, 3.14)                    | -0.45 (-7.03, 6.14)                    |
| 4                       | 0.42 (-5.20, 6.05)                     | -4.00 (-10.24, 2.24)                   | -1.93 (-8.51, 4.66)                    |
| 6                       | 3.66 (-1.96, 9.28)                     | -4.48 (-10.72, 1.76)                   | -0.31 (-6.89, 6.27)                    |
| 8                       | 4.33 (-1.29, 9.94)                     | -5.06 (-11.29, 1.18)                   | 0.52 (-6.05, 7.10)                     |

  

| Regression Analysis for Dependence of QT Correction on RR at Baseline<br>(Intent-to-Treat Population, N = 96) |                                         |                                         |
|---------------------------------------------------------------------------------------------------------------|-----------------------------------------|-----------------------------------------|
| QTcF<br>Regression Coefficient (95% CI)                                                                       | QTcB<br>Regression Coefficient (95% CI) | QTci<br>Regression Coefficient (95% CI) |
| 0.033 (0.024, 0.042)                                                                                          | -0.05 (-0.059, -0.041)                  | 0.005 (-0.003, 0.014)                   |

Abbreviations: CI, confidence interval; QTcB, Bazett-corrected QT interval; QTcF, Fridericia-corrected QT interval; QTci, calculated individual QT interval.

**Supplementary Table S5. Holter ECG Abnormalities for Pazopanib-Treated Patients in the Intent-to-Treat Population<sup>a</sup>**

| <b>Abnormality</b>                 | <b>Pazopanib-Treated Patients, n (%)</b> |                       |
|------------------------------------|------------------------------------------|-----------------------|
|                                    | <b>Baseline (n = 48)</b>                 | <b>Day 9 (n = 48)</b> |
| Sinus bradycardia                  | 3 (6)                                    | 7 (16)                |
| Ectopic supraventricular beats     | 3 (6)                                    | 6 (14)                |
| First degree AV block <sup>b</sup> | 1 (2)                                    | 3 (7)                 |
| T-wave inversion                   | 1 (2)                                    | 4 (9)                 |
| T waves flat                       | 4 (8)                                    | 8 (18)                |
| T waves biphasic                   | 1 (2)                                    | 3 (7)                 |
| ST depression                      | 2 (4)                                    | 3 (7)                 |

Abbreviations: AV, atrioventricular; ECG, electrocardiogram.

<sup>a</sup> Only those abnormalities that increased relative to placebo are listed.

<sup>b</sup> PR interval >200 msec.

*Cancer Chemotherapy and Pharmacology***Supplementary Table S6: Treatment-Emergent Adverse Events Among Patients Receiving Either Pazopanib or Placebo**

| Adverse Event                        | Patients, <i>n</i> (%)        |                             |
|--------------------------------------|-------------------------------|-----------------------------|
|                                      | Pazopanib<br>( <i>n</i> = 48) | Placebo<br>( <i>n</i> = 47) |
| Fatigue                              | 13 (27)                       | 5 (11)                      |
| Nausea                               | 12 (25)                       | 3 (6)                       |
| Decreased appetite                   | 8 (17)                        | 1 (2)                       |
| Hypertension                         | 7 (15)                        | 0                           |
| Weight decreased                     | 5 (10)                        | 0                           |
| Diarrhea                             | 4 (8)                         | 1 (2)                       |
| Dyspnea                              | 3 (6)                         | 2 (4)                       |
| Constipation                         | 3 (6)                         | 2 (4)                       |
| Vomiting                             | 3 (6)                         | 0                           |
| Paraesthesia                         | 3 (6)                         | 0                           |
| Dysphonia                            | 3 (6)                         | 0                           |
| Abdominal pain                       | 3 (6)                         | 0                           |
| Headache                             | 2 (4)                         | 1 (2)                       |
| Pyrexia                              | 2 (4)                         | 1 (2)                       |
| Back pain                            | 2 (4)                         | 3 (6)                       |
| ALT increased                        | 2 (4)                         | 0                           |
| AST increased                        | 2 (4)                         | 0                           |
| Dizziness                            | 2 (4)                         | 0                           |
| Feeling cold                         | 2 (4)                         | 0                           |
| Hypokalemia                          | 1 (2)                         | 4 (9)                       |
| Upper abdominal pain                 | 1 (2)                         | 2 (4)                       |
| Frequent bowel movements             | 1 (2)                         | 2 (4)                       |
| Hypomagnesemia                       | 1 (2)                         | 1 (2)                       |
| Blood alkaline phosphatase increased | 1 (2)                         | 1 (2)                       |
| Blurred vision                       | 1 (2)                         | 1 (2)                       |
| Musculoskeletal pain                 | 0                             | 2 (4)                       |
| Hematochezia                         | 0                             | 2 (4)                       |
| Hemoptysis                           | 0                             | 2 (4)                       |
| Anemia                               | 0                             | 2 (4)                       |
| Arthralgia                           | 0                             | 2 (4)                       |

Abbreviations: ALT, alanine aminotransferase; AST, aspartate aminotransferase.

*Cancer Chemotherapy and Pharmacology***Supplementary Table S7. Post-Hoc (0 - 24 hr) Analysis of Least-Squares Mean Difference in Heart Rate Changes from Baseline after Pazopanib Compared with Placebo**

| Day 9<br>Time Point, hr | Evaluable Population, N = 57 <sup>a</sup>     |  |
|-------------------------|-----------------------------------------------|--|
|                         | Heart Rate<br>Mean Difference in bpm (90% CI) |  |
| -0.5                    | -0.43 (-5.40, 4.53)                           |  |
| 1                       | -4.58 (-9.72, 0.56)                           |  |
| 2                       | -3.48 (-7.87, 0.91)                           |  |
| 3                       | -3.98 (-8.49, 0.54)                           |  |
| 4                       | -2.75 (-7.20, 1.70)                           |  |
| 6                       | -5.43 (-10.89, 0.02)                          |  |
| 8                       | -7.39 (-12.29, -2.49)                         |  |
| 12                      | -5.37 (-10.82, 0.09)                          |  |
| 16                      | -10.11 (-14.85, -5.37)                        |  |
| 20                      | -0.42 (-7.60, 6.77)                           |  |
| 24                      | -4.16 (-11.40, 3.07)                          |  |
|                         | Intent-to-Treat Population, N = 96            |  |
|                         | Heart Rate<br>Mean Difference in bpm (90% CI) |  |
| -0.5                    | -1.88 (-5.72, 1.97)                           |  |
| 1                       | -5.62 (-9.65, -1.59)                          |  |
| 2                       | -4.52 (-7.95, -1.08)                          |  |
| 3                       | -5.45 (-8.97, -1.94)                          |  |
| 4                       | -5.08 (-8.76, -1.40)                          |  |
| 6                       | -8.90 (-13.31, -4.49)                         |  |
| 8                       | -10.33 (-14.17, -6.49)                        |  |
| 12                      | -7.35 (-11.70, -3.00)                         |  |
| 16                      | -13.28 (-17.18, -9.37)                        |  |
| 20                      | -4.03 (-9.82, 1.76)                           |  |
| 24                      | -5.97 (-11.57, -0.37)                         |  |

<sup>a</sup> In this analysis, an additional 8 patients were deemed nonevaluable because of Holter recording technical problems.

Abbreviations: bpm, beats per minute; CI, confidence interval.



*Cancer Chemotherapy and Pharmacology***Supplementary Table S8. Post-Hoc (0 - 24 hr) Analysis of Least-Squares Mean Difference in QTc Change from Baseline for Patients Receiving Pazopanib Compared with Placebo**

| <b>Evaluable Population, N = 57<sup>a</sup></b> |                                                    |                                                    |                                                    |
|-------------------------------------------------|----------------------------------------------------|----------------------------------------------------|----------------------------------------------------|
| <b>Day 9 Time Point, hr</b>                     | <b>QTcF, msec<br/>Mean Difference<br/>(90% CI)</b> | <b>QTcB, msec<br/>Mean Difference<br/>(90% CI)</b> | <b>QTci, msec<br/>Mean Difference<br/>(90% CI)</b> |
| -0.5                                            | -0.46 (-6.66, 5.74)                                | -2.14 (-9.12, 4.84)                                | -2.46 (-9.03, 4.11)                                |
| 1                                               | 3.80 (-2.20, 9.80)                                 | -2.00 (-8.75, 4.75)                                | -0.52 (-6.91, 5.86)                                |
| 2                                               | 0.54 (-5.45, 6.54)                                 | -4.50 (-11.24, 2.25)                               | -2.65 (-9.02, 3.73)                                |
| 3                                               | 0.28 (-5.72, 6.27)                                 | -5.25 (-12.00, 1.49)                               | -3.48 (-9.86, 2.90)                                |
| 4                                               | -0.76 (-6.75, 5.24)                                | -4.83 (-11.57, 1.92)                               | -2.95 (-9.34, 3.44)                                |
| 6                                               | 3.03 (-2.96, 9.02)                                 | -4.21 (-10.95, 2.53)                               | -1.90 (-8.28, 4.48)                                |
| 8                                               | 4.05 (-1.95, 10.05)                                | -4.95 (-11.69, 1.79)                               | -1.16 (-7.54, 5.22)                                |
| 12                                              | -1.70 (-7.71, 4.31)                                | -8.58 (-15.32, -1.83)                              | -5.97 (-12.36, 0.42)                               |
| 16                                              | -1.97 (-8.00, 4.07)                                | -14.43 (-21.19, -7.68)                             | -8.97 (-15.37, -2.57)                              |
| 20                                              | 1.51 (-4.50, 7.51)                                 | -1.70 (-8.44, 5.05)                                | -1.84 (-8.23, 4.54)                                |
| 24                                              | 4.11 (-1.88, 10.10)                                | -0.37 (-7.11, 6.37)                                | 0.44 (-5.94, 6.82)                                 |

  

| <b>Intent-to-Treat Population, N = 96</b> |                                                    |                                                    |                                                    |
|-------------------------------------------|----------------------------------------------------|----------------------------------------------------|----------------------------------------------------|
|                                           | <b>QTcF, msec<br/>Mean Difference<br/>(90% CI)</b> | <b>QTcB, msec<br/>Mean Difference<br/>(90% CI)</b> | <b>QTci, msec<br/>Mean Difference<br/>(90% CI)</b> |
| -0.5                                      | 0.78 (-4.23, 5.78)                                 | -2.11 (-7.63, 3.41)                                | -1.92 (-7.71, 3.86)                                |
| 1                                         | 3.60 (-1.99, 9.20)                                 | -2.22 (-7.53, 3.09)                                | 0.41 (-5.22, 6.03)                                 |
| 2                                         | 1.92 (-3.18, 7.01)                                 | -3.21 (-8.57, 2.16)                                | -0.82 (-6.49, 4.85)                                |
| 3                                         | 2.76 (-2.61, 8.13)                                 | -2.88 (-8.24, 2.49)                                | -0.70 (-6.37, 4.97)                                |
| 4                                         | 1.21 (-4.07, 6.48)                                 | -3.68 (-9.04, 1.68)                                | -1.67 (-7.33, 4.00)                                |
| 6                                         | 4.18 (-1.28, 9.64)                                 | -4.59 (-9.95, 0.77)                                | -1.38 (-7.04, 4.28)                                |
| 8                                         | 4.93 (-0.07, 9.94)                                 | -5.14 (-10.49, 0.21)                               | -0.32 (-5.98, 5.33)                                |
| 12                                        | 0.90 (-4.78, 6.57)                                 | -6.29 (-11.64, -0.95)                              | -3.01 (-8.67, 2.64)                                |
| 16                                        | 0.72 (-5.34, 6.78)                                 | -12.12 (-17.49, -6.74)                             | -6.58 (-12.26, -0.90)                              |
| 20                                        | 3.87 (-2.31, 10.05)                                | -0.91 (-6.35, 4.53)                                | 0.17 (-5.55, 5.58)                                 |
| 24                                        | 4.44 (-0.94, 9.82)                                 | -0.90 (-6.34, 4.54)                                | -0.62 (-6.35, 5.10)                                |

Abbreviations: QTcB, Bazett-corrected QT interval; QTcF, Fridericia-corrected QT interval; QTci, calculated individual QT interval.

<sup>a</sup> In this analysis, an additional 8 patients were deemed nonevaluable because of Holter recording technical problems.
